# Supplementary material for: Changes in Growth, Photosynthesis Performance, Pigments, and Toxin Contents of Bloom-Forming Cyanobacteria after Exposure to Macroalgal Allelochemicals
Source: MDPI journal article supplement (doi:10.3390/toxins13080589), 2021-08-23
Supplement: s1 [file s1]

# Supplementary Materials: Changes in growth, Photosynthesis Performance, Pigments, and Toxins Contents of Bloom-Forming Cyanobacteria after Exposure to Macroalgal Allelochemicals

Gracjana Budzałek, Sylwia Śliwińska-Wilczewska, Marek Klin, Kinga Wiśniewska, Adam Latała and Józef Maria Wiktor

**Table S1.** MC-LR ( $\mu\text{g L}^{-1}$ ) and phenols content ( $\text{mg L}^{-1}$ ) for *Aphanizomenon* sp. CCBA69 (A), *N. spumigena* CCBA15 (B), and *Nostoc* sp. CCBA81 (C) for controls and treatments after the extract and cell-free filtrate additions obtained from macroalgae *U. intestinalis* after 7 days of the expositions.

| Target Cyanobacteria     | Control           | Extract                        | Cell-Free Filtrate |
|--------------------------|-------------------|--------------------------------|--------------------|
|                          |                   | MC-LR ( $\mu\text{g L}^{-1}$ ) |                    |
| <i>Aphanizomenon</i> sp. | ND                | ND                             | ND                 |
| <i>N. spumigena</i>      | ND                | ND                             | ND                 |
| <i>Nostoc</i> sp.        | $0.204 \pm 0.001$ | $0.069 \pm 0.017$              | $0.170 \pm 0.010$  |
|                          |                   | Phenols ( $\text{mg L}^{-1}$ ) |                    |
| <i>Aphanizomenon</i> sp. | $0.310 \pm 0.002$ | $5.010 \pm 0.020$              | $0.089 \pm 0.003$  |
| <i>N. spumigena</i>      | $0.804 \pm 0.010$ | $5.537 \pm 0.006$              | $0.954 \pm 0.006$  |
| <i>Nostoc</i> sp.        | $0.470 \pm 0.002$ | $5.253 \pm 0.015$              | $0.454 \pm 0.003$  |

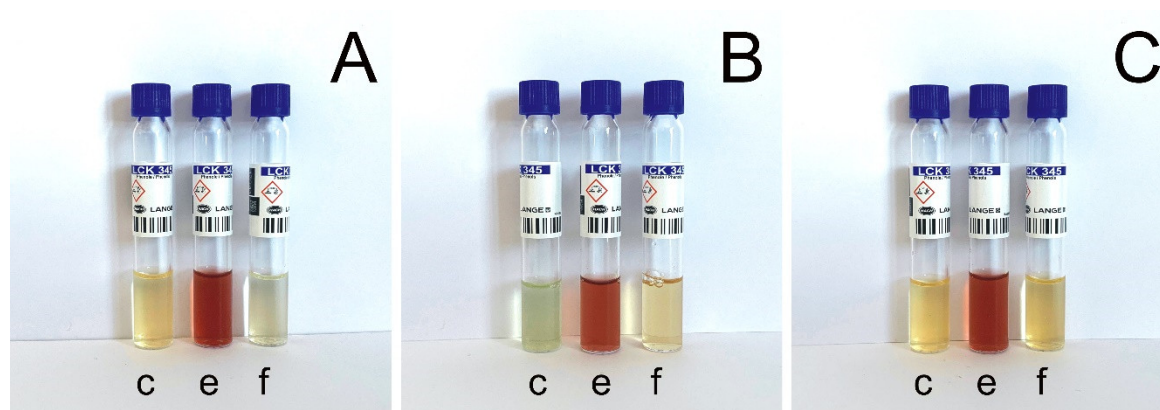

**Figure S1.** Phenols concentration ( $\text{mg L}^{-1}$ ) of *Aphanizomenon* sp. CCBA69 (A), *N. spumigena* CCBA15 (B), and *Nostoc* sp. CCBA81 (C) for controls (c) and treatments of extract (e), and cell-free filtrate (f) additions obtained from macroalgae *U. intestinalis* after 7 days of the expositions.
